# Supplementary material for: A casting combined quenching strategy to prepare PdAg single atom alloys designed using the cluster expansion combined Monte Carlo method
Source: Royal Society of Chemistry journal article supplement (doi:10.1039/d1cp05046j), 2021-12-23
Supplement: d1cp05046j1.pdf [file d1cp05046j1.pdf]

## Supporting Information

# A casting combined quenching strategy to prepare PdAg single atom alloy designed by Cluster Expansion combined Monte Carlo method

*Minghao Hua<sup>a</sup>, Xuelei Tian<sup>a</sup>, Shuo Li<sup>a</sup>, Xiaofu Zhang<sup>a</sup>, Anchen Shao<sup>a</sup>, Lin Song<sup>a</sup>, Xiaohang Lin<sup>a,\*</sup>*

<sup>a</sup> Key Laboratory for Liquid-Solid Structural Evolution and Processing of Materials, Ministry of Education, School of Materials Science and Engineering, Shandong University, 250061, Jinan, China

<sup>b</sup> School of Materials Science and Engineering, Harbin Institute of Technology, Harbin 150001, China

<sup>c</sup> Shandong Laboratory of Yantai Advanced Materials and Green Manufacture, Yantai, Shandong province, 2640000, China

\*Corresponding author. E-mail: lxh12345@sdu.edu.cn

We have calculated the frequency of CO-Pd bond using DFT simulation. The CO molecule adsorbed on Pd monomer (top site) and Pd dimer (bridge site) of PdAg(111) surface (see Figure 1), which compared with CO on top site and bridge site of pure Pd(111) surface (Table 1).

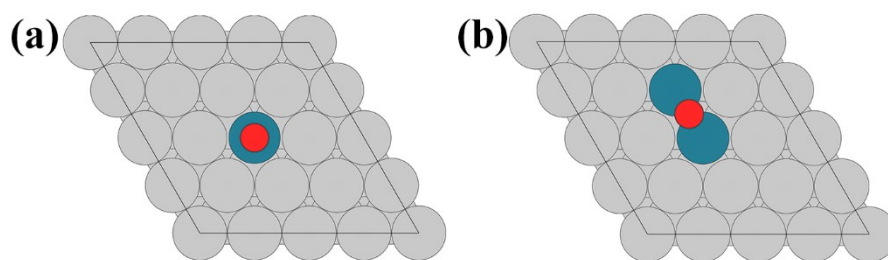

Figure 1. The CO adsorption positions on (a) Pd monomer (top site) and (b) Pd dimer (bridge site) of PdAg(111) surface. CO molecule, Ag atoms and Pd atoms are marked in red, grey and green, respectively.

Not only the trends of frequency changes on different surfaces but also the simulated value shows a good agreement with the experimental one. The linear CO frequency (top site) is about  $100\text{ cm}^{-1}$  larger than bridge CO, which agree with the practical experience. The Pd-CO frequency on PdAg surface is lower than on pure Pd surface, which can be explained by the fact that the charge transfer from Ag to Pd increases the  $2\pi$  back donation from Pd to the carbonyl C atom.

Table 1. The comparison of the frequency of CO-Pd bond between experiments and simulations

| Frequency ( $\text{cm}^{-1}$ ) | Pd monomer (PdAg(111)) | Pd dimer (PdAg(111)) | Pure Pd surface (top site) | Pure Pd surface (bridge site) |
|--------------------------------|------------------------|----------------------|----------------------------|-------------------------------|
| Experiment                     | 2023                   | 1922                 | 2108 <sup>[1]</sup>        | 1925 <sup>[1]</sup>           |
| Simulation                     | 2049                   | 1903                 | 2086 <sup>[1]</sup>        | 1913 <sup>[1]</sup>           |

## References

- [1] K. Honkala, P. Pirilä and K. Laasonen, CO and NO adsorption and co-adsorption on the Pd(111) surface, *Surf. Sci.*, 2001, 489, 72–82.
